# Supplementary material for: Achieving dynamic quintuple-mode luminescence in Ca3Ti2O7:Pr3+,Er3+ phosphor for anti-counterfeiting applications
Source: Royal Society of Chemistry journal article supplement (doi:10.1039/d3tc02783j), 2023-01-01
Supplement: d3tc02783j1.pdf [file d3tc02783j1.pdf]

# Achieving Dynamic Quintuple-mode Luminescence in $\text{Ca}_3\text{Ti}_2\text{O}_7$ : $\text{Pr}^{3+}$ , $\text{Er}^{3+}$ Phosphor for Anti-counterfeiting Applications

Jian Zhang<sup>a, †</sup>, Xin You<sup>a, †</sup>, Ting Wang<sup>b,\*</sup>, Yiyu Cai<sup>a</sup>, Chao Wang<sup>a</sup>, Xin Li<sup>a</sup>, Zhichao Liu<sup>a</sup>, Heng Dai<sup>a</sup>, Alexey Nikolaevich Yakovlev<sup>c</sup>, Xuhui Xu<sup>a</sup>, Jie Yu<sup>a,\*</sup>.

<sup>a</sup> Faculty of Materials Science and Engineering, Kunming University of Science and Technology, Kunming 650093, China.

<sup>b</sup> College of Materials and Chemistry & Chemical Engineering, Chengdu University of Technology, Chengdu 610059, China.

<sup>c</sup> T.F. Gorbachev Kuzbass State Technical University, Kemerovo 650000, Russia.

## Corresponding Authors

E-mail addresses: yujie@kust.edu.cn (J. Yu), wangtkm@foxmail.com (T. Wang).

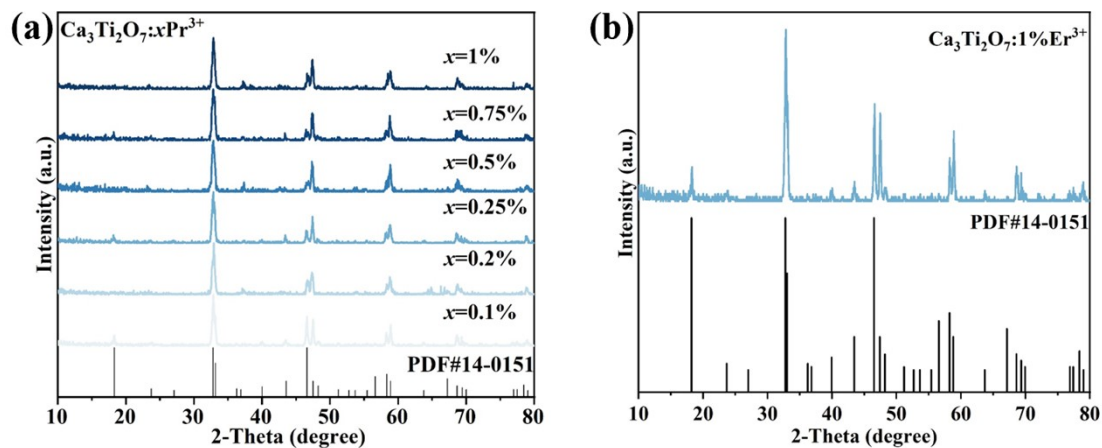

**Figure S1.** The XRD patterns of (a)  $\text{Ca}_3\text{Ti}_2\text{O}_7: x\text{Pr}^{3+}$  ( $x = 0.1\%$ ,  $0.2\%$ ,  $0.25\%$ ,  $0.5\%$ ,  $0.75\%$  and  $1\%$ ) and (b)  $\text{Ca}_3\text{Ti}_2\text{O}_7: 1\%\text{Er}^{3+}$  phosphors.

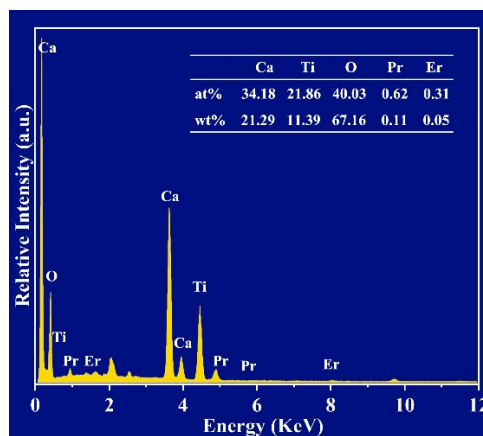

**Figure S2.** The EDS spectrum of representative  $\text{Ca}_3\text{Ti}_2\text{O}_7: 0.25\%\text{Pr}^{3+}, 1\%\text{Er}^{3+}$ .

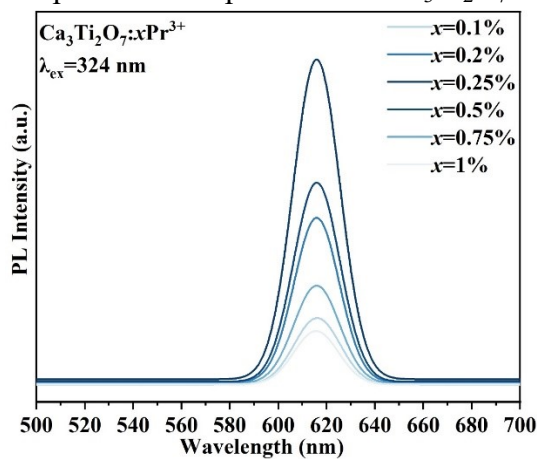

**Figure S3.** The PL spectra of  $\text{Ca}_3\text{Ti}_2\text{O}_7: x\text{Pr}^{3+}$  ( $x = 0.1\%$ ,  $0.2\%$ ,  $0.25\%$ ,  $0.5\%$ ,  $0.75\%$  and  $1\%$ ).

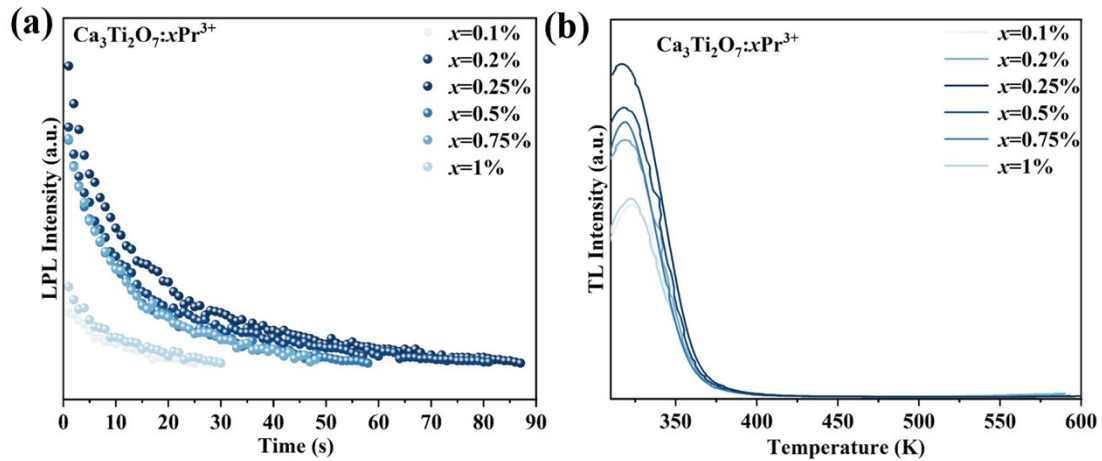

**Figure S4.** (a) The LPL decay curves and (b) TL curves of  $\text{Ca}_3\text{Ti}_2\text{O}_7: x\text{Pr}^{3+}$  ( $x = 0.1\%$ ,  $0.2\%$ ,  $0.25\%$ ,  $0.5\%$ ,  $0.75\%$  and  $1\%$ ).

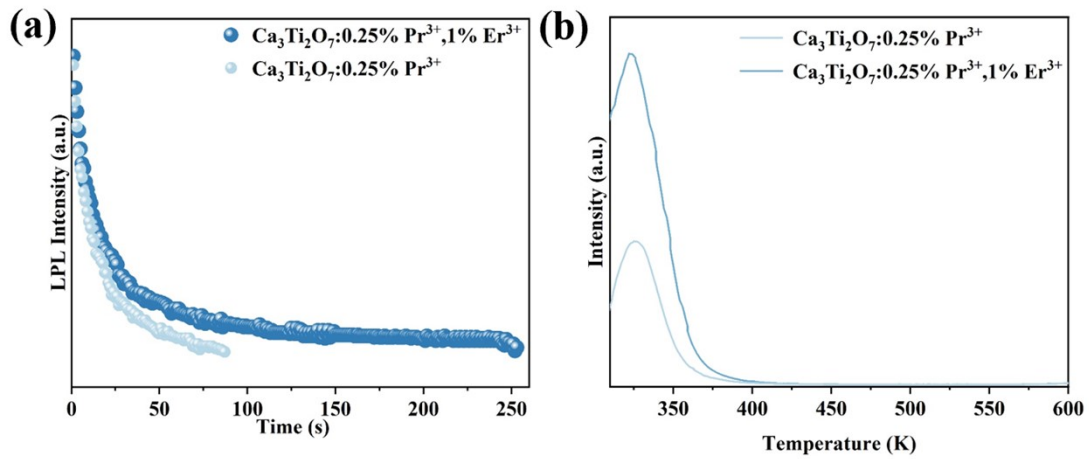

**Figure S5.** (a) The LPL decay curves and (b) TL curves of  $\text{Ca}_3\text{Ti}_2\text{O}_7: 0.25\%\text{Pr}^{3+}$  and  $\text{Ca}_3\text{Ti}_2\text{O}_7: 0.25\%\text{Pr}^{3+}, 1\%\text{Er}^{3+}$ .

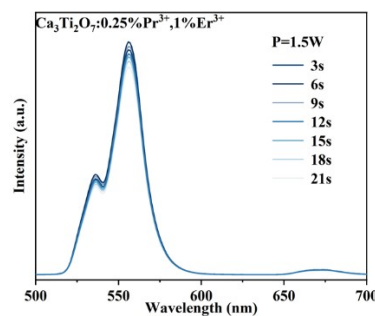

**Figure S6.** The UCL spectra of  $\text{Ca}_3\text{Ti}_2\text{O}_7: 0.25\%\text{Pr}^{3+}, 1\%\text{Er}^{3+}$  under  $980\text{ nm}$  ( $1.5\text{ W}$ ) laser with the irradiation time prolonged to  $21\text{ s}$ .

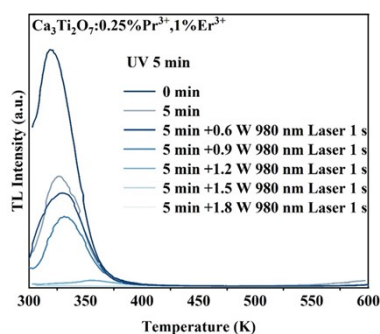

**Figure S7.** The TL curves of  $\text{Ca}_3\text{Ti}_2\text{O}_7: 0.25\%\text{Pr}^{3+}, 1\%\text{Er}^{3+}$  treated with different pump power of 980 nm laser. The phosphors are charged by UV irradiation for 5 mins.

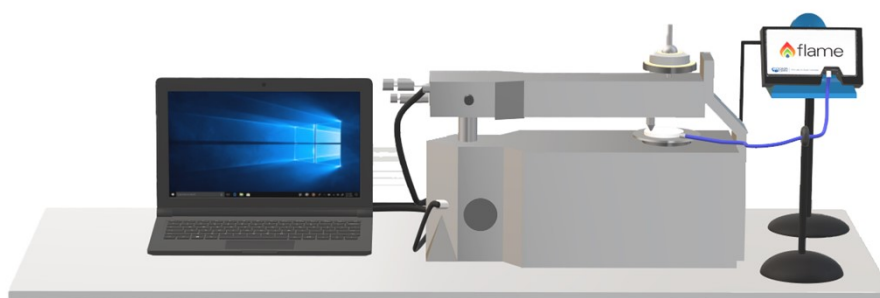

**Figure S8.** The schematic diagram of MS-T3001 multifunctional material surface property tester cooperated with an optical fiber.

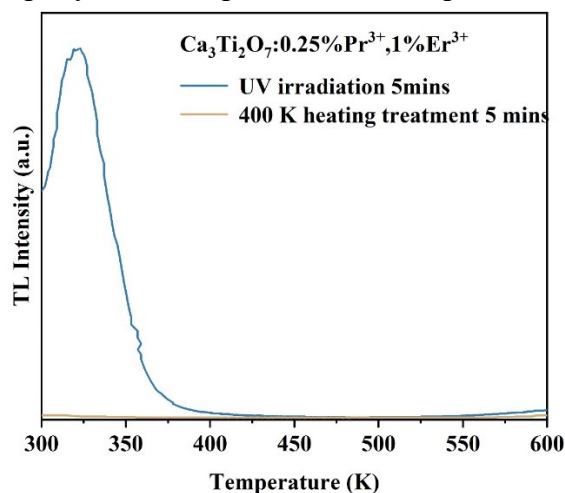

**Figure S9.** The TL curves of  $\text{Ca}_3\text{Ti}_2\text{O}_7: 0.25\%\text{Pr}^{3+}, 1\%\text{Er}^{3+}$  with UV irradiation for 5 mins or heating treatment at 400 K for 5 mins.

The ML composited films were fabricated by uniformly mixing the sifted powders (600 mesh size) with the PDMS at the weight ratio of 1:3, followed by transferring the mixture into cylindrical mold. Finally, the ML films were successfully shaped in the drying oven at 340 K for 3 h.

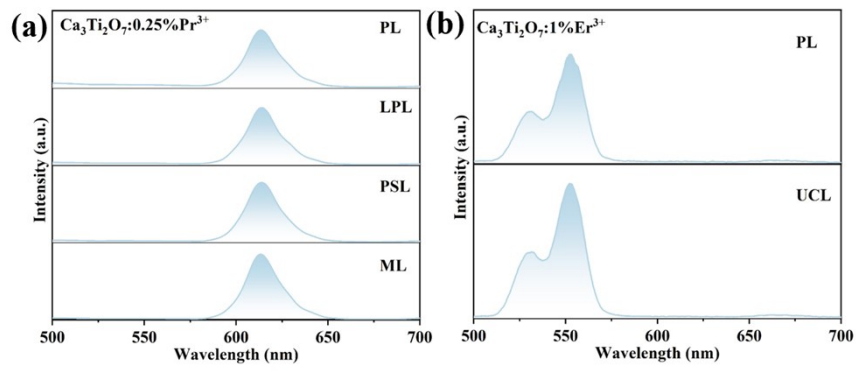

**Figure S10.** (a) The PL, LPL, PSL, ML spectra of  $\text{Ca}_3\text{Ti}_2\text{O}_7:0.25\%\text{Pr}^{3+}$ , (b) The PL and UCL spectra of  $\text{Ca}_3\text{Ti}_2\text{O}_7:1\%\text{Er}^{3+}$ .
